# Supplementary material for: Stage- and Rearing-Dependent Metabolomics Profiling of Ophiocordyceps sinensis and Its Pipeline Products
Source: MDPI journal article supplement (doi:10.3390/insects12080666), 2021-07-22
Supplement: s1 [file s1]

---

*Supplementary materials for*

**Stage- and Rearing-Dependent Metabolomics Profiling of  
*Ophiocordyceps sinensis* and Its Pipeline Products**

Contents:

**Table S1.** Treatments and identifiers.

**Table S2.** List of identified metabolites.

**Table S3.** Abundance profiles of identified metabolites.

**Table S4.** Sample-based top ten concentrated metabolites.

**Table S5.** SAM results.

**Table S6.** Pathway predictions of featured metabolites.

**Table S1.** Treatments and identifiers.

| Code | Description                                 | Location                | Sample size | Remark                             |
|------|---------------------------------------------|-------------------------|-------------|------------------------------------|
| WCF  | Wild caterpillar fungus                     | Kangding,<br>Sichuan    | 50          |                                    |
| CCF  | Company reared caterpillar fungus           | Guangzhou,<br>Guangdong | 50          | Liyuan Co. Ltd                     |
| LCF0 | Lab reared caterpillar fungus               | Lab colony              | 50          | Before stroma<br>development       |
| LCF1 | Lab reared caterpillar fungus               | Lab colony              | 50          | Fruiting body length<br>~ 1 cm     |
| LCF2 | Lab reared caterpillar fungus               | Lab colony              | 50          | Fruiting body length<br>~ 2 - 3 cm |
| LCF3 | Lab reared caterpillar fungus               | Lab colony              | 50          | Fruiting body length<br>~ 4 - 5 cm |
| LCF4 | Lab reared caterpillar fungus               | Lab colony              | 50          | Fruiting body<br>length > 6 cm     |
| LFB  | Lab reared <i>O. sinensis</i> fruiting body | Lab colony              | 50          | Rice-wheat medium                  |
| LOS1 | Lab reared <i>O. sinensis</i> mycelium      | Lab colony              | 50          | PM medium, 20 d*                   |
| LOS2 | Lab reared <i>O. sinensis</i> mycelium      | Lab colony              | 50          | PM medium, 40 d                    |
| LOS3 | Lab reared <i>O. sinensis</i> mycelium      | Lab colony              | 50          | PM medium, 60 d                    |
| LOS4 | Lab reared <i>O. sinensis</i> mycelium      | Lab colony              | 50          | PM medium, 80 d                    |
| LOS5 | Lab reared <i>O. sinensis</i> mycelium      | Lab colony              | 50          | PM medium, 100 d                   |
| TxLU | Lab reared <i>T. xiaojinensis</i> larva     | Lab colony              | 50          | Uninfected, 5 - 6<br>instar        |
| TxLI | Lab reared <i>T. xiaojinensis</i> larva     | Lab colony              | 50          | Infected, 5 - 6 instar             |
| TxPU | Lab reared <i>T. xiaojinensis</i> pupa      | Lab colony              | 50          | Uninfected                         |
| TxPI | Lab reared <i>T. xiaojinensis</i> pupa      | Lab colony              | 50          | Infected                           |

\* PM medium supplemented with 0.5% *Galleria mellonella* larvae homogenate,  $11 \pm 2$  °C

**Table S2.** Metabolites identified from different products by GC-QTOF-MS analysis.

| Code | Retention time<br>(min) | Family         | Compound name                     | Match<br>factor | Formula                                        | Derivatives of<br>molecular formula                             | CAS          | m/z (M <sup>+</sup> ) |              | m/z (M-CH <sub>3</sub> ) <sup>+</sup> |              | RSD (%<br>n=3) |
|------|-------------------------|----------------|-----------------------------------|-----------------|------------------------------------------------|-----------------------------------------------------------------|--------------|-----------------------|--------------|---------------------------------------|--------------|----------------|
|      |                         |                |                                   |                 |                                                |                                                                 |              | Theoretical           | Experimental | Theoretical                           | Experimental |                |
| P1   | 14.17                   | ketone         | Acetylacetone                     | 81              | C <sub>8</sub> H <sub>14</sub> O <sub>2</sub>  | C <sub>8</sub> H <sub>16</sub> O <sub>2</sub> Si                | 13257-81-3   | 172.0914              | 172.0916     | 157.0685                              |              | 12.19          |
| P2   | 14.29                   | Amino acid     | N, N-Dimethylglycine              | 86              | C <sub>4</sub> H <sub>9</sub> NO <sub>2</sub>  | C <sub>7</sub> H <sub>17</sub> NO <sub>2</sub> Si               | 1000333-18-4 | 175.1023              |              | 160.0794                              |              | 11.90          |
| P3   | 14.37                   | Organic acid   | Methoxyimino-acetic acid          | 90              | C <sub>3</sub> H <sub>5</sub> NO <sub>3</sub>  | C <sub>6</sub> H <sub>13</sub> NO <sub>3</sub> Si               | 55493-91-9   | 175.0659              |              | 160.0430                              | 160.0433     | 10.41          |
| P4   | 14.47                   | Inorganic acid | Boric acid                        | 89              | H <sub>3</sub> BO <sub>3</sub>                 | C <sub>9</sub> H <sub>27</sub> BO <sub>3</sub> Si <sub>3</sub>  | 4325-85-3    | 277.1392              |              | 262.1162                              |              | 12.16          |
| P5   | 14.48                   | Pyridine       | 2,3,6-Trimethyl-pyridine          | 87              | C <sub>8</sub> H <sub>11</sub> N               | C <sub>8</sub> H <sub>11</sub> N                                | 1462-84-6    | 121.0886              | 121.0895     | 106.0656                              |              | 10.00          |
|      |                         | derivative     |                                   |                 |                                                |                                                                 |              |                       |              |                                       |              |                |
| P6   | 15.90                   | Ester          | tert-Butyl carbamate              | 80              | C <sub>5</sub> H <sub>11</sub> NO <sub>2</sub> | C <sub>10</sub> H <sub>27</sub> NO <sub>2</sub> Si <sub>3</sub> | 1000366-58-2 | 277.1344              |              | 262.1115                              | 262.1130     | 12.83          |
| P7   | 16.38                   | Organic acid   | 2-Methoxyimino-propionic acid     | 84              | C <sub>4</sub> H <sub>7</sub> NO <sub>3</sub>  | C <sub>7</sub> H <sub>15</sub> NO <sub>3</sub> Si               | 55493-92-0   | 189.0816              |              | 174.0586                              | 174.0590     | 12.17          |
| P8   | 16.53                   | Organic acid   | Diethyl-carbamic acid             | 87              | C <sub>5</sub> H <sub>11</sub> NO <sub>2</sub> | C <sub>8</sub> H <sub>19</sub> NO <sub>2</sub> Si               | 1000322-56-6 | 189.1180              | 189.1190     | 174.0950                              |              | 8.66           |
| P9   | 16.74                   | Organic acid   | Lactic Acid                       | 96              | C <sub>3</sub> H <sub>6</sub> O <sub>3</sub>   | C <sub>9</sub> H <sub>22</sub> O <sub>3</sub> Si <sub>2</sub>   | 17596-96-2   | 234.1102              | 234.1171     | 219.0872                              |              | 10.47          |
| P10  | 17.08                   | Ester          | Butanedioic acid, dimethyl ester  | 80              | C <sub>6</sub> H <sub>10</sub> O <sub>4</sub>  | C <sub>6</sub> H <sub>10</sub> O <sub>4</sub>                   | 106-65-0     | 146.0574              |              | 131.0344                              | 131.0349     | 11.78          |
| P11  | 17.18                   | Organic acid   | Glycolic acid                     | 94              | C <sub>2</sub> H <sub>4</sub> O <sub>3</sub>   | C <sub>8</sub> H <sub>20</sub> O <sub>3</sub> Si <sub>2</sub>   | 33581-77-0   | 220.0945              |              | 205.0716                              | 205.0720     | 9.86           |
| P12  | 17.49                   | Amino acid     | L-Valine                          | 87              | C <sub>5</sub> H <sub>11</sub> NO <sub>2</sub> | C <sub>8</sub> H <sub>19</sub> NO <sub>2</sub> Si               | 7480-78-6    | 189.1180              |              | 174.0950                              | 174.0947     | 9.44           |
| P13  | 18.06                   | Amino acid     | L-Alanine                         | 97              | C <sub>3</sub> H <sub>7</sub> NO <sub>2</sub>  | C <sub>9</sub> H <sub>23</sub> NO <sub>2</sub> Si <sub>2</sub>  | 27844-07-1   | 233.1262              |              | 218.1032                              | 218.1037     | 13.44          |
| P14  | 19.02                   | Amino acid     | Glycine                           | 95              | C <sub>2</sub> H <sub>5</sub> NO <sub>2</sub>  | C <sub>8</sub> H <sub>21</sub> NO <sub>2</sub> Si <sub>2</sub>  | 7364-42-3    | 219.1105              |              | 204.0876                              | 204.0883     | 10.64          |
| P15  | 19.06                   | Pyridine       | 3-Pyridinol                       | 82              | C <sub>5</sub> H <sub>5</sub> NO               | C <sub>8</sub> H <sub>13</sub> NOSi                             | 41571-88-4   | 167.0761              | 167.0771     | 152.0531                              |              | 6.28           |
|      |                         | derivative     |                                   |                 |                                                |                                                                 |              |                       |              |                                       |              |                |
| P16  | 19.23                   | Organic acid   | 3-Mercapto-propionic acid         | 82              | C <sub>3</sub> H <sub>6</sub> O <sub>2</sub> S | C <sub>9</sub> H <sub>22</sub> O <sub>2</sub> SSi <sub>2</sub>  | 1000385-85-7 | 250.0874              |              | 235.0644                              |              | 11.12          |
| P17  | 19.53                   | Pyridine       | 4-Pyridinol                       | 85              | C <sub>5</sub> H <sub>5</sub> NO               | C <sub>8</sub> H <sub>13</sub> NOSi                             | 1000352-50-3 | 167.0761              | 167.0772     | 152.0531                              |              | 11.16          |
|      |                         | derivative     |                                   |                 |                                                |                                                                 |              |                       |              |                                       |              |                |
| P18  | 19.80                   | Organic acid   | 3-Hydroxy-2-methyl-propionic acid | 89              | C <sub>4</sub> H <sub>8</sub> O <sub>3</sub>   | C <sub>10</sub> H <sub>24</sub> O <sub>3</sub> Si <sub>2</sub>  | 55530-42-2   | 248.1258              |              | 233.1029                              | 233.1038     | 9.29           |
| P19  | 20.19                   | Amino acid     | 2-Aminobutanoic acid              | 94              | C <sub>4</sub> H <sub>9</sub> NO <sub>2</sub>  | C <sub>10</sub> H <sub>25</sub> NO <sub>2</sub> Si <sub>2</sub> | 55133-91-0   | 247.1418              |              | 232.1189                              |              | 12.73          |

| Code | Retention time<br>(min) | Family                   | Compound name                    | Match<br>factor | Formula                                                     | Derivatives of<br>molecular formula                                           | CAS          | m/z (M <sup>+</sup> ) |              | m/z (M-CH3) <sup>+</sup> |              | RSD (%<br>n=3) |
|------|-------------------------|--------------------------|----------------------------------|-----------------|-------------------------------------------------------------|-------------------------------------------------------------------------------|--------------|-----------------------|--------------|--------------------------|--------------|----------------|
|      |                         |                          |                                  |                 |                                                             |                                                                               |              | Theoretical           | Experimental | Theoretical              | Experimental |                |
| P20  | 20.39                   | Ester                    | Phosphoric acid monomethyl ester | 84              | CH <sub>5</sub> O <sub>4</sub> P                            | C <sub>7</sub> H <sub>21</sub> O <sub>4</sub> PSi <sub>2</sub>                | 18291-81-1   | 256.0711              | 256.0721     | 241.0481                 |              | 10.73          |
| P21  | 21.26                   | Amino acid               | 3-Aminoisobutyric acid           | 97              | C <sub>4</sub> H <sub>9</sub> NO <sub>2</sub>               | C <sub>10</sub> H <sub>25</sub> NO <sub>2</sub> Si <sub>2</sub>               | 58521-52-1   | 247.1418              |              | 232.1189                 | 232.1195     | 10.23          |
| P22  | 21.98                   | Organic acid             | 4-Hydroxybutanoic acid           | 86              | C <sub>4</sub> H <sub>8</sub> O <sub>3</sub>                | C <sub>10</sub> H <sub>24</sub> O <sub>3</sub> Si <sub>2</sub>                | 55133-95-4   | 248.1258              |              | 233.1029                 | 233.1038     | 10.48          |
| P23  | 22.19                   | Amino acid               | 2-Amino-3-methyl-butyric acid    | 85              | C <sub>5</sub> H <sub>11</sub> NO <sub>2</sub>              | C <sub>11</sub> H <sub>27</sub> NO <sub>2</sub> Si <sub>2</sub>               | 1000386-63-4 | 261.1575              |              | 246.1345                 |              | 14.26          |
| P24  | 22.68                   | Amino acid               | L-Serine                         | 92              | C <sub>3</sub> H <sub>7</sub> NO <sub>3</sub>               | C <sub>9</sub> H <sub>23</sub> NO <sub>3</sub> Si <sub>2</sub>                | 70125-39-2   | 249.1211              |              | 234.0981                 | 234.0988     | 9.93           |
| P25  | 22.99                   | Amine                    | Ethanolamine                     | 96              | C <sub>2</sub> H <sub>7</sub> NO                            | C <sub>11</sub> H <sub>31</sub> NOSi <sub>3</sub>                             | 5630-81-9    | 277.1708              |              | 262.1478                 | 262.1489     | 10.59          |
| P26  | 23.15                   | Amino acid               | L-Leucine                        | 96              | C <sub>6</sub> H <sub>13</sub> NO <sub>2</sub>              | C <sub>12</sub> H <sub>29</sub> NO <sub>2</sub> Si <sub>2</sub>               | 7364-46-7    | 275.1731              |              | 260.1502                 | 260.1511     | 9.12           |
| P27  | 23.28                   | Polyol                   | Glycerol                         | 94              | C <sub>3</sub> H <sub>8</sub> O <sub>3</sub>                | C <sub>12</sub> H <sub>32</sub> O <sub>3</sub> Si <sub>3</sub>                | 6787/10/6    | 308.1654              |              | 293.1424                 | 293.1433     | 8.30           |
| P28  | 23.67                   | Organic acid             | Niacin                           | 89              | C <sub>6</sub> H <sub>5</sub> NO <sub>2</sub>               | C <sub>9</sub> H <sub>13</sub> NO <sub>2</sub> Si                             | 25436-37-7   | 195.0710              |              | 180.0480                 | 180.0487     | 7.42           |
| P29  | 23.86                   | Amino acid               | L-Proline                        | 83              | C <sub>5</sub> H <sub>9</sub> NO <sub>2</sub>               | C <sub>11</sub> H <sub>25</sub> NO <sub>2</sub> Si <sub>2</sub>               | 7364-47-8    | 259.1418              |              | 244.1189                 | 244.1195     | 8.58           |
| P30  | 24.84                   | Organic acid             | Glyceric acid                    | 92              | C <sub>3</sub> H <sub>6</sub> O <sub>4</sub>                | C <sub>12</sub> H <sub>30</sub> O <sub>4</sub> Si <sub>3</sub>                | 38191-87-6   | 322.1446              |              | 307.1217                 |              | 8.71           |
| P31  | 25.01                   | Pyrimidine<br>derivative | Uracil                           | 95              | C <sub>4</sub> H <sub>4</sub> N <sub>2</sub> O <sub>2</sub> | C <sub>10</sub> H <sub>20</sub> N <sub>2</sub> O <sub>2</sub> Si <sub>2</sub> | 10457-14-4   | 256.1058              | 256.1059     | 241.0828                 |              | 10.86          |
| P32  | 25.07                   | Organic acid             | E-2-Butenedioic acid             | 93              | C <sub>4</sub> H <sub>4</sub> O <sub>4</sub>                | C <sub>10</sub> H <sub>20</sub> O <sub>4</sub> Si <sub>2</sub>                | 17962-03-7   | 260.0895              |              | 245.0665                 | 245.0674     | 8.77           |
| P33  | 25.66                   | Amino acid               | DL-Serine                        | 94              | C <sub>3</sub> H <sub>7</sub> NO <sub>3</sub>               | C <sub>12</sub> H <sub>31</sub> NO <sub>3</sub> Si <sub>3</sub>               | 64625-17-8   | 321.1606              |              | 306.1377                 | 306.1396     | 9.97           |
| P34  | 26.23                   | Ester                    | Isopropyl formate                | 94              | C <sub>4</sub> H <sub>8</sub> O <sub>2</sub>                | C <sub>4</sub> H <sub>8</sub> O <sub>2</sub>                                  | 625-55-8     | 88.0519               |              | 73.0289                  |              | 8.40           |
| P35  | 26.39                   | Amino acid               | L-Threonine                      | 97              | C <sub>4</sub> H <sub>9</sub> NO <sub>3</sub>               | C <sub>13</sub> H <sub>33</sub> NO <sub>3</sub> Si <sub>3</sub>               | 7537/2/2     | 335.1763              |              | 320.1533                 | 320.1550     | 9.87           |
| P36  | 26.62                   | Organic acid             | Pentanedioic acid                | 89              | C <sub>5</sub> H <sub>8</sub> O <sub>4</sub>                | C <sub>11</sub> H <sub>24</sub> O <sub>4</sub> Si <sub>2</sub>                | 55494-07-0   | 276.1208              |              | 261.0978                 | 261.0983     | 11.27          |
| P37  | 26.86                   | Amino acids              | L-Methionine                     | 84              | C <sub>5</sub> H <sub>11</sub> NO <sub>2</sub> S            | C <sub>8</sub> H <sub>19</sub> NO <sub>2</sub> SSi                            | 1000333-29-4 | 221.0900              | 221.0902     | 206.0671                 |              | 14.05          |
| P38  | 27.36                   | Amino acids              | β-Alanine                        | 96              | C <sub>3</sub> H <sub>7</sub> NO <sub>2</sub>               | C <sub>12</sub> H <sub>31</sub> NO <sub>2</sub> Si <sub>3</sub>               | 55255-77-1   | 305.1657              |              | 290.1428                 | 290.1442     | 9.42           |
| P39  | 27.86                   | Pyridine<br>derivative   | 2,2'-Bipyridine                  | 83              | C <sub>10</sub> H <sub>8</sub> N <sub>2</sub>               | C <sub>10</sub> H <sub>8</sub> N <sub>2</sub>                                 | 366-18-7     | 156.0682              | 156.0692     | 141.0452                 |              | 11.00          |
| P40  | 27.98                   | Amino acid               | Homoserine                       | 87              | C <sub>4</sub> H <sub>9</sub> NO <sub>3</sub>               | C <sub>13</sub> H <sub>33</sub> NO <sub>3</sub> Si <sub>3</sub>               | 1177129-58-6 | 335.1763              |              | 320.1533                 | 320.1549     | 13.42          |
| P41  | 28.16                   | ketone                   | 3-Amino-2-piperidone             | 81              | C <sub>5</sub> H <sub>10</sub> N <sub>2</sub> O             | C <sub>11</sub> H <sub>26</sub> N <sub>2</sub> OSi <sub>2</sub>               | 32565-12-1   | 258.1578              | 258.1594     | 243.1349                 |              | 13.01          |

| Code | Retention time<br>(min) | Family       | Compound name                               | Match<br>factor | Formula                                                      | Derivatives of<br>molecular formula                                           | CAS          | m/z (M <sup>+</sup> ) |              | m/z (M-CH3) <sup>+</sup> |              | RSD (%<br>n=3) |
|------|-------------------------|--------------|---------------------------------------------|-----------------|--------------------------------------------------------------|-------------------------------------------------------------------------------|--------------|-----------------------|--------------|--------------------------|--------------|----------------|
|      |                         |              |                                             |                 |                                                              |                                                                               |              | Theoretical           | Experimental | Theoretical              | Experimental |                |
| P42  | 28.55                   | Organic acid | Aminomalonic acid                           | 95              | C <sub>3</sub> H <sub>3</sub> NO <sub>4</sub>                | C <sub>12</sub> H <sub>29</sub> NO <sub>4</sub> Si <sub>3</sub>               | 1000079-52-5 | 335.1399              |              | 320.1169                 | 320.1185     | 12.57          |
| P43  | 28.99                   | Organic acid | DL-malic acid                               | 95              | C <sub>4</sub> H <sub>6</sub> O <sub>5</sub>                 | C <sub>13</sub> H <sub>30</sub> O <sub>5</sub> Si <sub>3</sub>                | 38166-11-9   | 350.1396              |              | 335.1166                 | 335.1182     | 8.85           |
| P44  | 29.60                   | Polyol       | Erythritol                                  | 86              | C <sub>4</sub> H <sub>10</sub> O <sub>4</sub>                | C <sub>16</sub> H <sub>42</sub> O <sub>4</sub> Si <sub>4</sub>                | 18547-29-0   | 410.2155              |              | 395.1925                 |              | 8.45           |
| P45  | 29.80                   | Amino acid   | L-Aspartic acid                             | 89              | C <sub>4</sub> H <sub>7</sub> NO <sub>4</sub>                | C <sub>13</sub> H <sub>31</sub> NO <sub>4</sub> Si <sub>3</sub>               | 55268-53-6   | 349.1555              | 349.1578     | 334.1326                 |              | 13.52          |
| P46  | 29.88                   | Amino acid   | L-5-Oxoproline                              | 93              | C <sub>5</sub> H <sub>8</sub> NO <sub>3</sub>                | C <sub>11</sub> H <sub>23</sub> NO <sub>3</sub> Si <sub>2</sub>               | 30274-77-2   | 273.1211              | 273.1226     | 258.0981                 |              | 9.18           |
| P47  | 29.99                   | Amino acid   | 4-Aminobutanoic acid                        | 93              | C <sub>4</sub> H <sub>8</sub> NO <sub>2</sub>                | C <sub>13</sub> H <sub>33</sub> NO <sub>2</sub> Si <sub>3</sub>               | 39508-23-1   | 319.1814              |              | 304.1584                 | 304.1597     | 9.52           |
| P48  | 30.39                   | Amino acid   | DL-Phenylalanine                            | 92              | C <sub>9</sub> H <sub>11</sub> NO <sub>2</sub>               | C <sub>12</sub> H <sub>19</sub> NO <sub>2</sub> Si                            | 2899-42-5    | 237.1180              |              | 222.0950                 | 222.0953     | 9.57           |
| P49  | 30.66                   | Amino acid   | Cysteine                                    | 91              | C <sub>3</sub> H <sub>7</sub> NO <sub>2</sub> S              | C <sub>12</sub> H <sub>31</sub> NO <sub>2</sub> SSi <sub>3</sub>              | 1000153-02-1 | 337.1378              |              | 322.1148                 |              | 16.86          |
| P50  | 30.91                   | Organic acid | 2,3,4-Trihydroxy-butanoic acid              | 92              | C <sub>4</sub> H <sub>6</sub> O <sub>5</sub>                 | C <sub>16</sub> H <sub>40</sub> O <sub>5</sub> Si <sub>4</sub>                | 1000352-53-3 | 424.1947              |              | 409.1718                 | 409.1741     | 11.02          |
| P51  | 31.07                   | Organic acid | 2-Hydroxyglutaric acid                      | 91              | C <sub>5</sub> H <sub>8</sub> O <sub>5</sub>                 | C <sub>14</sub> H <sub>32</sub> O <sub>5</sub> Si <sub>3</sub>                | 55530-62-6   | 364.1552              |              | 349.1323                 | 349.1345     | 10.08          |
| P52  | 31.57                   | Amino acid   | L-Asparagine                                | 94              | C <sub>4</sub> H <sub>8</sub> N <sub>2</sub> O <sub>3</sub>  | C <sub>10</sub> H <sub>24</sub> N <sub>2</sub> O <sub>3</sub> Si <sub>2</sub> | 1000333-25-8 | 276.1320              | 276.1332     | 261.1090                 |              | 13.08          |
| P53  | 31.77                   | Organic acid | Pipecolic acid                              | 85              | C <sub>6</sub> H <sub>11</sub> NO <sub>2</sub>               | C <sub>12</sub> H <sub>27</sub> NO <sub>2</sub> Si <sub>2</sub>               | 55255-44-2   | 273.1575              |              | 258.1345                 |              | 9.90           |
| P54  | 32.03                   | Amino acid   | L-Ornithine                                 | 80              | C <sub>5</sub> H <sub>12</sub> N <sub>2</sub> O <sub>2</sub> | C <sub>14</sub> H <sub>36</sub> N <sub>2</sub> O <sub>2</sub> Si <sub>3</sub> | 24595-70-8   | 348.2079              | 348.2106     | 333.1850                 |              | 12.74          |
| P55  | 32.15                   | Amino acid   | L-Glutamic acid                             | 95              | C <sub>5</sub> H <sub>8</sub> NO <sub>4</sub>                | C <sub>14</sub> H <sub>33</sub> NO <sub>4</sub> Si <sub>3</sub>               | 15985-07-6   | 363.1712              | 363.1742     | 348.1482                 |              | 12.57          |
| P56  | 32.38                   | Amino acid   | L-Phenylalanine                             | 98              | C <sub>9</sub> H <sub>11</sub> NO <sub>2</sub>               | C <sub>13</sub> H <sub>27</sub> NO <sub>2</sub> Si <sub>2</sub>               | 7364-51-4    | 309.1575              |              | 294.1345                 | 294.1359     | 7.63           |
| P57  | 33.15                   | Organic acid | 3,4,5-Trihydroxy-pentanoic acid             | 88              | C <sub>5</sub> H <sub>10</sub> O <sub>5</sub>                | C <sub>17</sub> H <sub>42</sub> O <sub>5</sub> Si <sub>4</sub>                | 1000149-61-6 | 438.2104              |              | 423.1874                 |              | 11.12          |
| P58  | 33.41                   | Amine        | Asparagine                                  | 95              | C <sub>4</sub> H <sub>8</sub> N <sub>2</sub> O <sub>3</sub>  | C <sub>13</sub> H <sub>32</sub> N <sub>2</sub> O <sub>3</sub> Si <sub>3</sub> | 55649-62-2   | 348.1715              | 348.1740     | 333.1486                 |              | 11.25          |
| P59  | 33.76                   | Sugar        | 2,3,4,5-Tetrahydroxy-pentanal O-ethyl-oxime | 85              | C <sub>7</sub> H <sub>13</sub> NO <sub>5</sub>               | C <sub>19</sub> H <sub>47</sub> NO <sub>5</sub> Si <sub>4</sub>               | 1000394-64-9 | 481.2526              |              | 466.2296                 |              | 10.90          |
| P60  | 34.34                   | Organic acid | 2-Amino adipic acid                         | 87              | C <sub>6</sub> H <sub>11</sub> NO <sub>4</sub>               | C <sub>15</sub> H <sub>33</sub> NO <sub>4</sub> Si <sub>3</sub>               | 66434-50-2   | 377.1868              | 377.1897     | 362.1639                 |              | 11.81          |
| P61  | 34.73                   | Polyol       | Xylitol                                     | 92              | C <sub>5</sub> H <sub>12</sub> O <sub>5</sub>                | C <sub>20</sub> H <sub>52</sub> O <sub>5</sub> Si <sub>5</sub>                | 14199-72-5   | 512.2656              |              | 497.2426                 |              | 5.26           |
| P62  | 34.90                   | Amine        | Putrescine                                  | 96              | C <sub>4</sub> H <sub>12</sub> N <sub>2</sub>                | C <sub>16</sub> H <sub>44</sub> N <sub>2</sub> Si <sub>4</sub>                | 39772-63-9   | 376.2576              |              | 361.2347                 | 361.2366     | 12.92          |
| P63  | 35.01                   | Organic acid | Aconitic acid                               | 91              | C <sub>6</sub> H <sub>6</sub> O <sub>6</sub>                 | C <sub>15</sub> H <sub>30</sub> O <sub>6</sub> Si <sub>3</sub>                | 55530-71-7   | 390.1345              |              | 375.1115                 | 375.1132     | 12.20          |
| P64  | 35.18                   | Amino acid   | DL-Ornithine                                | 93              | C <sub>5</sub> H <sub>12</sub> N <sub>2</sub> O <sub>2</sub> | C <sub>14</sub> H <sub>36</sub> N <sub>2</sub> O <sub>2</sub> Si <sub>3</sub> | 1000333-14-1 | 348.2079              | 348.2104     | 333.1850                 |              | 12.78          |

| Code | Retention time<br>(min) | Family            | Compound name                                     | Match<br>factor | Formula                                                      | Derivatives of<br>molecular formula                                           | CAS          | m/z (M <sup>+</sup> ) |              | m/z (M-CH3) <sup>+</sup> |              | RSD (%<br>n=3) |
|------|-------------------------|-------------------|---------------------------------------------------|-----------------|--------------------------------------------------------------|-------------------------------------------------------------------------------|--------------|-----------------------|--------------|--------------------------|--------------|----------------|
|      |                         |                   |                                                   |                 |                                                              |                                                                               |              | Theoretical           | Experimental | Theoretical              | Experimental |                |
| P65  | 35.61                   | Ester             | Phosphoric acid mono-(2,3-dihydroxy-propyl) ester | 92              | C <sub>3</sub> H <sub>9</sub> O <sub>6</sub> P               | C <sub>15</sub> H <sub>41</sub> O <sub>6</sub> PSi <sub>4</sub>               | 31038-11-6   | 460.1712              |              | 445.1483                 | 445.1516     | 10.85          |
| P66  | 35.73                   | Amine             | L-Glutamine                                       | 94              | C <sub>5</sub> H <sub>10</sub> N <sub>2</sub> O <sub>3</sub> | C <sub>14</sub> H <sub>34</sub> N <sub>2</sub> O <sub>3</sub> Si <sub>3</sub> | 70591-28-5   | 362.1872              | 362.1897     | 347.1642                 |              | 10.62          |
| P67  | 35.95                   | Organic acid      | Terephthalic acid                                 | 88              | C <sub>8</sub> H <sub>6</sub> O <sub>4</sub>                 | C <sub>14</sub> H <sub>22</sub> O <sub>4</sub> Si <sub>2</sub>                | 4147-84-6    | 310.1051              | 310.1062     | 295.0822                 |              | 9.60           |
| P68  | 35.98                   | Organic acid      | 3,4,5,6-Tetrahydroxy-2-oxo-hexanoic acid          | 81              | C <sub>6</sub> H <sub>12</sub> O <sub>7</sub>                | C <sub>21</sub> H <sub>30</sub> O <sub>7</sub> Si <sub>5</sub>                | 1000059-82-4 | 554.2397              |              | 539.2168                 |              | 12.32          |
| P69  | 36.02                   | Amine             | Phosphorylethanolamine                            | 94              | C <sub>2</sub> H <sub>5</sub> NO <sub>4</sub> P              | C <sub>14</sub> H <sub>40</sub> NO <sub>4</sub> PSi <sub>4</sub>              | 55334-92-4   | 429.1767              |              | 414.1537                 |              | 15.59          |
| P70  | 36.38                   | Purine derivative | 9H-Purin-6-ol                                     | 89              | C <sub>5</sub> H <sub>4</sub> N <sub>4</sub> O               | C <sub>11</sub> H <sub>20</sub> N <sub>4</sub> OSi <sub>2</sub>               | 17962-89-9   | 280.1170              | 280.1183     | 265.0941                 |              | 14.26          |
| P71  | 36.83                   | Organic acid      | Citric acid                                       | 88              | C <sub>6</sub> H <sub>8</sub> O <sub>7</sub>                 | C <sub>18</sub> H <sub>40</sub> O <sub>7</sub> Si <sub>4</sub>                | 14330-97-3   | 480.1846              |              | 465.1616                 | 465.1647     | 12.02          |
| P72  | 36.98                   | Organic acid      | Myristic acid                                     | 83              | C <sub>14</sub> H <sub>28</sub> O <sub>2</sub>               | C <sub>17</sub> H <sub>30</sub> O <sub>2</sub> Si                             | 18603-17-3   | 300.2479              | 300.2490     | 285.2250                 |              | 9.90           |
| P73  | 37.02                   | Amine             | Cadaverine                                        | 82              | C <sub>5</sub> H <sub>14</sub> N <sub>2</sub>                | C <sub>17</sub> H <sub>46</sub> N <sub>2</sub> Si <sub>4</sub>                | 65898-76-2   | 390.2733              |              | 375.2503                 | 375.2520     | 14.61          |
| P74  | 38.02                   | Amino acid        | DL-tyrosine                                       | 90              | C <sub>9</sub> H <sub>11</sub> NO <sub>3</sub>               | C <sub>15</sub> H <sub>27</sub> NO <sub>3</sub> Si <sub>2</sub>               | 7536-83-6    | 325.1524              |              | 310.1294                 | 310.1311     | 11.92          |
| P75  | 38.09                   | Sugar             | D-Fructose                                        | 87              | C <sub>6</sub> H <sub>12</sub> NO <sub>6</sub>               | C <sub>22</sub> H <sub>35</sub> NO <sub>6</sub> Si <sub>5</sub>               | 56196-14-6   | 569.2870              |              | 554.2641                 |              | 7.35           |
| P76  | 38.39                   | Sugar             | d-Glucose                                         | 82              | C <sub>6</sub> H <sub>12</sub> O <sub>6</sub>                | C <sub>22</sub> H <sub>35</sub> NO <sub>6</sub> Si <sub>5</sub>               | 130405-10-6  | 569.2870              |              | 554.2640                 |              | 7.30           |
| P77  | 38.47                   | Sugar             | Galactopyranose                                   | 87              | C <sub>6</sub> H <sub>12</sub> O <sub>6</sub>                | C <sub>21</sub> H <sub>32</sub> O <sub>6</sub> Si <sub>5</sub>                | 1769-00-2    | 540.2605              |              | 525.2375                 |              | 12.30          |
| P78  | 38.67                   | Sugar             | D-Allose                                          | 93              | C <sub>7</sub> H <sub>13</sub> NO <sub>6</sub>               | C <sub>22</sub> H <sub>35</sub> NO <sub>6</sub> Si <sub>5</sub>               | 1000380-19-7 | 569.2870              |              | 554.2640                 |              | 6.01           |
| P79  | 38.82                   | Amino acid        | L-Lysine                                          | 81              | C <sub>6</sub> H <sub>14</sub> N <sub>2</sub> O <sub>2</sub> | C <sub>18</sub> H <sub>46</sub> N <sub>2</sub> O <sub>2</sub> Si <sub>4</sub> | 55429-07-7   | 434.2631              | 434.2663     | 419.2401                 |              | 9.53           |
| P80  | 38.87                   | Amino acid        | L-Histidine                                       | 81              | C <sub>6</sub> H <sub>9</sub> N <sub>3</sub> O <sub>2</sub>  | C <sub>15</sub> H <sub>33</sub> N <sub>3</sub> O <sub>2</sub> Si <sub>3</sub> | 17908-25-7   | 371.1875              | 371.1901     | 356.1646                 |              | 10.29          |
| P81  | 39.18                   | Amino acid        | L-Tyrosine                                        | 92              | C <sub>9</sub> H <sub>11</sub> NO <sub>3</sub>               | C <sub>18</sub> H <sub>35</sub> NO <sub>3</sub> Si <sub>3</sub>               | 51220-73-6   | 397.1919              |              | 382.1690                 | 382.1714     | 9.75           |
| P82  | 40.15                   | Sugar             | Glucopyranose                                     | 94              | C <sub>6</sub> H <sub>12</sub> O <sub>6</sub>                | C <sub>21</sub> H <sub>32</sub> O <sub>6</sub> Si <sub>5</sub>                | 1000157-49-7 | 540.2605              |              | 525.2375                 |              | 15.98          |
| P83  | 40.56                   | Organic acid      | 9-Hexadecenoic acid                               | 93              | C <sub>16</sub> H <sub>30</sub> O <sub>2</sub>               | C <sub>19</sub> H <sub>38</sub> O <sub>2</sub> Si                             | 1000333-19-8 | 326.2636              |              | 311.2406                 | 311.2425     | 11.82          |
| P84  | 40.78                   | Organic acid      | D-Gluconic acid                                   | 90              | C <sub>6</sub> H <sub>12</sub> O <sub>7</sub>                | C <sub>24</sub> H <sub>60</sub> O <sub>7</sub> Si <sub>6</sub>                | 34290-52-3   | 628.2949              |              | 613.2720                 |              | 11.29          |
| P85  | 40.94                   | Organic acid      | Palmitic Acid                                     | 93              | C <sub>16</sub> H <sub>32</sub> O <sub>2</sub>               | C <sub>19</sub> H <sub>40</sub> O <sub>2</sub> Si                             | 55520-89-3   | 328.2792              | 328.2815     | 313.2563                 |              | 10.90          |
| P86  | 41.23                   | Polyol            | Scyllo-Inositol                                   | 88              | C <sub>6</sub> H <sub>12</sub> O <sub>6</sub>                | C <sub>24</sub> H <sub>60</sub> O <sub>6</sub> Si <sub>6</sub>                | 14251-18-4   | 612.3000              |              | 597.2770                 |              | 13.00          |

| Code | Retention time<br>(min) | Family            | Compound name | Match<br>factor | Formula                                                        | Derivatives of<br>molecular formula                                            | CAS          | m/z (M <sup>+</sup> ) |              | m/z (M-CH3) <sup>+</sup> |              | RSD (%<br>n=3) |
|------|-------------------------|-------------------|---------------|-----------------|----------------------------------------------------------------|--------------------------------------------------------------------------------|--------------|-----------------------|--------------|--------------------------|--------------|----------------|
|      |                         |                   |               |                 |                                                                |                                                                                |              | Theoretical           | Experimental | Theoretical              | Experimental |                |
| P87  | 42.00                   | Organic acid      | Ferulic acid  | 84              | C <sub>10</sub> H <sub>10</sub> O <sub>4</sub>                 | C <sub>16</sub> H <sub>26</sub> O <sub>6</sub> Si <sub>2</sub>                 | 10517-09-6   | 338.1364              | 338.1380     | 323.1135                 |              | 14.57          |
| P88  | 42.35                   | Organic acid      | Lanthionine   | 87              | C <sub>6</sub> H <sub>12</sub> N <sub>2</sub> O <sub>4</sub> S | C <sub>18</sub> H <sub>44</sub> N <sub>2</sub> O <sub>4</sub> SSi <sub>4</sub> | 73200-54-1   | 496.2093              |              | 481.1864                 |              | 9.36           |
| P89  | 42.43                   | Polyol            | Myo-Inositol  | 80              | C <sub>6</sub> H <sub>12</sub> O <sub>6</sub>                  | C <sub>24</sub> H <sub>60</sub> O <sub>6</sub> Si <sub>6</sub>                 | 2582-79-8    | 612.3000              |              | 597.2770                 |              | 8.17           |
| P90  | 44.05                   | Organic acid      | Linoleic acid | 95              | C <sub>18</sub> H <sub>32</sub> O <sub>2</sub>                 | C <sub>21</sub> H <sub>40</sub> O <sub>2</sub> Si                              | 56259-07-5   | 352.2792              | 352.2816     | 337.2563                 |              | 11.05          |
| P91  | 44.06                   | Organic acid      | Kynurenine    | 80              | C <sub>10</sub> H <sub>12</sub> N <sub>2</sub> O <sub>3</sub>  | C <sub>19</sub> H <sub>36</sub> N <sub>2</sub> O <sub>3</sub> Si <sub>3</sub>  | 72088-03-0   | 424.2028              | 424.2058     | 409.1799                 |              | 11.83          |
| P92  | 44.15                   | Organic acid      | Oleic acid    | 96              | C <sub>18</sub> H <sub>34</sub> O <sub>2</sub>                 | C <sub>21</sub> H <sub>42</sub> O <sub>2</sub> Si                              | 21556-26-3   | 354.2949              | 354.2975     | 339.2719                 |              | 10.28          |
| P93  | 44.37                   | Thioether         | Cystathionine | 87              | C <sub>7</sub> H <sub>14</sub> N <sub>2</sub> O <sub>4</sub> S | C <sub>19</sub> H <sub>46</sub> N <sub>2</sub> O <sub>4</sub> SSi <sub>4</sub> | 1000141-33-0 | 510.2250              | 510.2263     | 495.2020                 |              | 15.83          |
| P94  | 44.53                   | Organic acid      | Stearic acid  | 90              | C <sub>18</sub> H <sub>36</sub> O <sub>2</sub>                 | C <sub>21</sub> H <sub>44</sub> O <sub>2</sub> Si                              | 18748-91-9   | 356.3105              | 356.3129     | 341.2876                 |              | 10.84          |
| P95  | 44.59                   | Amino acid        | L-Tryptophan  | 92              | C <sub>11</sub> H <sub>12</sub> N <sub>2</sub> O <sub>2</sub>  | C <sub>20</sub> H <sub>36</sub> N <sub>2</sub> O <sub>2</sub> Si <sub>3</sub>  | 55429-28-2   | 420.2079              |              | 405.1850                 |              | 12.94          |
| P96  | 44.87                   | Polyol            | D-Glucitol    | 86              | C <sub>6</sub> H <sub>10</sub> O <sub>4</sub>                  | C <sub>24</sub> H <sub>62</sub> O <sub>6</sub> Si <sub>6</sub>                 | 14199-80-5   | 614.3157              |              | 599.2927                 |              | 11.68          |
| P97  | 51.72                   | Purine derivative | Adenosine     | 91              | C <sub>10</sub> H <sub>13</sub> N <sub>5</sub> O <sub>4</sub>  | C <sub>22</sub> H <sub>45</sub> N <sub>5</sub> O <sub>4</sub> Si <sub>4</sub>  | 53294-33-0   | 555.2543              |              | 540.2314                 | 540.2352     | 10.19          |
| P98  | 52.36                   | Sugar             | Sucrose       | 96              | C <sub>12</sub> H <sub>22</sub> O <sub>11</sub>                | C <sub>36</sub> H <sub>86</sub> O <sub>11</sub> Si <sub>8</sub>                | 19159-25-2   | 918.4319              |              | 903.4089                 |              | 9.02           |

**Table S3.** The concentrations of identified metabolites in different products.

| Compound No. | Retention<br>time (min) | Compound name                     | Concentration of identified metabolites (mg/kg) |          |          |         |          |          |          |         |         |          |          |         |          |         |         |         |         |
|--------------|-------------------------|-----------------------------------|-------------------------------------------------|----------|----------|---------|----------|----------|----------|---------|---------|----------|----------|---------|----------|---------|---------|---------|---------|
|              |                         |                                   | WCF                                             | CCF      | LCF0     | LCF1    | LCF2     | LCF3     | LCF4     | LFB     | LOS1    | LOS2     | LOS3     | LOS4    | LOS5     | TxLU    | TxLI    | TxPU    | TxPI    |
| P1           | 14.16                   | Acetylacetone                     | 22.11                                           | 37.30    | 31.47    | 25.92   | 38.20    | 50.20    | 47.50    | 45.39   | 28.76   | 4.60     | 9.45     | 20.78   | 13.22    | 3.41    | 4.33    | 7.01    | 0.65    |
| P2           | 14.29                   | N,N-Dimethylglycine               | 243.17                                          | 208.43   | 153.30   | 121.60  | 228.74   | 269.58   | 215.45   | 701.50  | 36.73   | 21.59    | 21.72    | 112.13  | 10.74    | 1.90    | 3.02    | 7.96    | 5.10    |
| P3           | 14.37                   | Methoxyimino-acetic acid          | 17.73                                           | 17.44    | 21.30    | 15.31   | 20.36    | 20.77    | 36.86    | 30.05   | 111.42  | 85.59    | 96.46    | 126.09  | 132.45   | 39.53   | 30.91   | 185.49  | 103.89  |
| P4           | 14.46                   | Boric acid                        | 118.32                                          | 184.00   | 169.60   | 107.53  | 180.39   | 148.54   | 491.75   | 139.57  | 317.78  | 128.68   | 237.14   | 192.67  | 220.94   | 471.49  | 432.11  | 212.15  | 226.31  |
| P5           | 14.48                   | 2,3,6-Trimethyl-pyridine          | 159.11                                          | 157.34   | 132.39   | 104.01  | 150.90   | 153.69   | 132.38   | 174.04  | 3.28    | 1.92     | 3.17     | 0.67    | 2.56     | 1.14    | 0.41    | 126.94  | 112.44  |
| P6           | 15.89                   | tert-Butyl carbamate              | 197.31                                          | 337.76   | 202.47   | 131.37  | 298.57   | 301.32   | 408.68   | 404.55  | 54.55   | 54.96    | 64.35    | 43.42   | 75.91    | 270.21  | 293.26  | 173.80  | 105.89  |
| P7           | 16.38                   | 2-Methoxyimino-propionic acid     | 18.15                                           | 14.64    | 9.43     | 8.29    | 13.77    | 17.93    | 19.10    | 31.23   | 85.67   | 63.59    | 19.80    | 16.86   | 7.40     | 4234.35 | 5204.40 | 388.32  | 149.14  |
| P8           | 16.53                   | Diethyl-carbamic acid             | 293.97                                          | 281.61   | 241.37   | 180.79  | 273.17   | 262.05   | 233.23   | 301.11  | 973.07  | 928.75   | 984.63   | 791.82  | 1038.96  | 1485.06 | 1425.82 | 249.14  | 208.57  |
| P9           | 16.74                   | Lactic Acid                       | 262.84                                          | 134.52   | 26.92    | 19.01   | 33.21    | 31.40    | 52.64    | 39.80   | 287.25  | 393.74   | 324.14   | 481.33  | 294.24   | 1018.86 | 1014.22 | 6045.37 | 6573.05 |
| P10          | 17.08                   | Butanedioic acid, dimethyl ester  | 440.52                                          | 737.82   | 349.28   | 162.96  | 631.66   | 581.58   | 571.28   | 441.59  | 178.24  | 188.23   | 161.55   | 739.67  | 243.65   | 170.86  | 351.95  | 312.12  | 95.12   |
| P11          | 17.18                   | Glycolic acid                     | 29.17                                           | 13.43    | 6.77     | 6.31    | 8.94     | 9.29     | 8.06     | 25.90   | 27.95   | 31.68    | 33.72    | 32.53   | 31.23    | 8.93    | 10.49   | 60.75   | 15.04   |
| P12          | 17.86                   | L-Valine                          | 4.37                                            | 0.83     | 5.61     | 6.57    | 8.40     | 12.50    | 8.47     | 0.40    | 97.13   | 92.80    | 83.76    | 85.32   | 76.67    | 2.05    | 2.98    | 9.83    | 9.12    |
| P13          | 18.06                   | L-Alanine                         | 1532.95                                         | 683.85   | 272.41   | 126.94  | 358.38   | 396.47   | 256.80   | 298.76  | 272.02  | 302.56   | 363.16   | 245.45  | 316.11   | 3453.44 | 3216.76 | 3463.97 | 2725.67 |
| P14          | 19.01                   | Glycine                           | 481.51                                          | 341.67   | 560.37   | 549.46  | 198.61   | 408.40   | 366.07   | 4001.34 | 9299.10 | 12954.94 | 21889.46 | 9604.60 | 38851.59 | 268.04  | 133.05  | 6760.30 | 3057.74 |
| P15          | 19.06                   | 3-Pyridinol                       | 8765.55                                         | 11994.33 | 11396.86 | 9214.47 | 12249.28 | 12955.70 | 13077.65 | 8853.46 | 5984.45 | 5903.30  | 6098.06  | 6715.71 | 6141.78  | 6682.80 | 6752.34 | 8544.07 | 7206.75 |
| P16          | 19.23                   | 3-Mercapto-propionic acid         | 252.56                                          | 185.34   | 138.16   | 97.80   | 165.00   | 148.30   | 157.32   | 256.05  | 46.63   | 55.58    | 52.09    | 36.25   | 59.11    | 229.32  | 234.29  | 176.03  | 158.22  |
| P17          | 19.53                   | 4-Pyridinol                       | 228.87                                          | 332.42   | 288.62   | 217.05  | 350.83   | 385.92   | 425.83   | 964.46  | 65.32   | 86.56    | 56.59    | 43.20   | 63.01    | 150.60  | 143.90  | 216.46  | 160.07  |
| P18          | 19.80                   | 3-Hydroxy-2-methyl-propionic acid | 7.17                                            | 5.63     | 3.23     | 1.81    | 3.15     | 4.02     | 4.77     | 6.41    | 5.44    | 6.97     | 6.70     | 7.41    | 6.24     | 6.12    | 5.29    | 112.41  | 55.62   |
| P19          | 20.19                   | 2-Aminobutanoic acid              | 2114.87                                         | 1304.48  | 617.31   | 393.20  | 1090.17  | 1576.69  | 1229.56  | 2328.01 | 46.71   | 113.48   | 40.49    | 142.16  | 179.82   | 581.68  | 996.38  | 1718.48 | 1102.83 |
| P20          | 20.39                   | Phosphoric acid monomethyl ester  | 179.90                                          | 1031.86  | 967.18   | 755.76  | 1322.20  | 1382.37  | 2067.30  | 405.24  | 102.95  | 57.35    | 46.45    | 45.19   | 45.20    | 276.93  | 149.12  | 670.34  | 254.98  |
| P21          | 21.27                   | 3-Aminoisobutyric acid            | 123.05                                          | 201.42   | 155.71   | 86.81   | 198.09   | 196.39   | 174.26   | 12.56   | 13.94   | 13.71    | 13.57    | 12.77   | 14.02    | 90.74   | 116.91  | 316.33  | 181.92  |
| P22          | 21.98                   | 4-Hydroxybutanoic acid            | 35.59                                           | 17.43    | 1.01     | 0.61    | 1.63     | 0.97     | 1.01     | 2.02    | 7.13    | 7.07     | 0.35     | 0.88    | 5.82     | 97.41   | 102.40  | 218.66  | 176.86  |

| Compound No. | Retention<br><br>time (min) | Compound name                  | Concentration of identified metabolites (mg/kg) |          |          |          |          |          |          |          |           |           |           |           |          |          |          |          |          |
|--------------|-----------------------------|--------------------------------|-------------------------------------------------|----------|----------|----------|----------|----------|----------|----------|-----------|-----------|-----------|-----------|----------|----------|----------|----------|----------|
|              |                             |                                | WCF                                             | CCF      | LCF0     | LCF1     | LCF2     | LCF3     | LCF4     | LFB      | LOS1      | LOS2      | LOS3      | LOS4      | LOS5     | TxLU     | TxLI     | TxPU     | TxPI     |
| P23          | 22.19                       | 2-Amino-3-methyl-butyrlic acid | 4556.04                                         | 6253.25  | 14957.70 | 12834.32 | 4776.84  | 5902.09  | 4727.77  | 14237.23 | 992.65    | 1306.63   | 909.45    | 956.69    | 822.80   | 5074.36  | 5417.07  | 12341.94 | 14932.24 |
| P24          | 22.68                       | L-Serine                       | 461.03                                          | 380.59   | 367.16   | 362.33   | 418.20   | 495.85   | 297.70   | 1156.61  | 62239.54  | 66830.66  | 67186.83  | 61732.64  | 62623.95 | 1416.82  | 838.87   | 1642.15  | 1137.64  |
| P25          | 22.99                       | Ethanolamine                   | 5486.70                                         | 14613.05 | 4884.95  | 2717.61  | 8168.20  | 6261.64  | 5748.89  | 5169.70  | 2031.49   | 1825.74   | 2003.12   | 1389.81   | 1216.37  | 2813.30  | 4329.33  | 13157.66 | 15314.62 |
| P26          | 23.14                       | L-Leucine                      | 6339.12                                         | 7025.40  | 14.37    | 13.62    | 6990.66  | 5541.88  | 5241.97  | 13.97    | 3702.95   | 1188.12   | 4180.09   | 3018.31   | 3833.31  | 10316.26 | 4623.58  | 5746.90  | 13696.77 |
| P27          | 23.28                       | Glycerol                       | 11092.81                                        | 3271.00  | 1044.27  | 1142.15  | 1850.21  | 1112.01  | 1726.57  | 189.35   | 10068.92  | 12084.80  | 2713.29   | 10666.96  | 9719.46  | 14297.52 | 15522.63 | 14790.47 | 18679.14 |
| P28          | 23.67                       | Niacin                         | 451.76                                          | 71.76    | 66.07    | 57.75    | 95.01    | 69.81    | 58.72    | 131.82   | 2403.55   | 2724.46   | 2438.08   | 2436.68   | 2353.37  | 140.22   | 176.08   | 856.14   | 517.96   |
| P29          | 23.88                       | L-Proline                      | 1510.97                                         | 1309.66  | 965.06   | 736.53   | 1324.62  | 1599.71  | 1478.36  | 2014.04  | 89.89     | 53.09     | 45.47     | 47.77     | 68.02    | 7217.87  | 7852.28  | 3061.73  | 1687.94  |
| P30          | 24.84                       | Glyceric acid                  | 293.12                                          | 131.03   | 46.02    | 31.62    | 75.55    | 54.88    | 47.09    | 130.79   | 445.49    | 474.92    | 502.38    | 517.95    | 484.43   | 14.33    | 21.40    | 53.08    | 37.62    |
| P31          | 25.01                       | Uracil                         | 188.87                                          | 98.82    | 61.38    | 44.13    | 142.93   | 72.92    | 85.03    | 126.71   | 231.49    | 208.21    | 235.58    | 213.22    | 197.31   | 161.05   | 133.52   | 5866.79  | 4126.95  |
| P32          | 25.07                       | E-2-Butenedioic acid           | 910.15                                          | 1196.15  | 540.58   | 390.40   | 945.92   | 1400.62  | 1280.29  | 1909.46  | 13798.90  | 14488.33  | 10939.72  | 7229.46   | 4797.94  | 26.04    | 25.55    | 175.14   | 245.85   |
| P33          | 25.67                       | DL-Serine                      | 6311.68                                         | 7493.97  | 1564.24  | 6254.15  | 6435.23  | 6909.08  | 5763.74  | 7963.18  | 4.12      | 4.66      | 3.71      | 7.24      | 7.93     | 7878.86  | 8685.83  | 12876.62 | 8628.52  |
| P34          | 26.39                       | Isopropyl formate              | 9529.63                                         | 11763.25 | 10448.76 | 6342.61  | 11233.07 | 12631.63 | 12001.17 | 5587.11  | 0.00      | 0.00      | 0.00      | 0.00      | 0.00     | 10826.84 | 11731.32 | 10767.83 | 8422.46  |
| P35          | 26.39                       | L-Threonine                    | 2924.09                                         | 3831.47  | 3272.19  | 1829.34  | 3511.11  | 4430.95  | 3868.68  | 1438.79  | 99.46     | 109.30    | 2.88      | 86.14     | 3.83     | 3567.80  | 3994.00  | 3545.48  | 2565.63  |
| P36          | 26.62                       | Pentanedioic acid              | 14.39                                           | 5.94     | 4.55     | 3.49     | 5.06     | 6.14     | 8.35     | 3.81     | 11.74     | 0.84      | 1.56      | 0.57      | 1.05     | 2.89     | 4.73     | 331.15   | 48.77    |
| P37          | 26.87                       | L-Methionine                   | 0.46                                            | 1.04     | 0.75     | 1.67     | 0.49     | 0.42     | 0.17     | 1.70     | 218.73    | 469.59    | 162.08    | 358.00    | 273.90   | 0.46     | 0.26     | 27.15    | 24.48    |
| P38          | 27.36                       | β-Alanine                      | 523.42                                          | 595.61   | 266.67   | 124.29   | 329.50   | 363.99   | 377.28   | 355.08   | 143003.83 | 204567.98 | 108996.13 | 177710.15 | 783.25   | 7691.04  | 12693.48 | 7897.27  | 4436.54  |
| P39          | 27.85                       | 2,2'-Bipyridine                | 50.57                                           | 94.82    | 76.45    | 61.73    | 97.74    | 116.71   | 101.31   | 267.79   | 284.88    | 37.48     | 21.74     | 37.07     | 47.19    | 15.77    | 6.33     | 49.73    | 34.51    |
| P40          | 27.98                       | Homoserine                     | 559.46                                          | 261.97   | 101.15   | 100.02   | 311.18   | 335.65   | 331.37   | 1949.09  | 2.64      | 4.56      | 3.97      | 2.78      | 7.33     | 9.32     | 171.83   | 72.48    | 53.13    |
| P41          | 28.16                       | 3-Amino-2-piperidone           | 841.32                                          | 3196.20  | 2834.81  | 1125.34  | 3448.69  | 4111.60  | 3041.25  | 116.89   | 0.41      | 3.45      | 6.95      | 8.44      | 9.56     | 758.25   | 504.90   | 2529.71  | 1061.87  |
| P42          | 28.55                       | Aminomalonic acid              | 103.33                                          | 46.59    | 36.44    | 15.85    | 42.79    | 29.22    | 16.70    | 163.14   | 5331.36   | 4529.33   | 4620.47   | 4026.48   | 4148.23  | 521.54   | 405.20   | 210.22   | 104.08   |
| P43          | 28.99                       | DL-malic acid                  | 1250.27                                         | 2003.09  | 1091.34  | 829.23   | 1870.60  | 2436.24  | 2719.45  | 3103.46  | 30824.21  | 30833.39  | 31150.41  | 31157.06  | 31692.57 | 361.80   | 467.90   | 2077.42  | 1482.09  |
| P44          | 29.60                       | Erythritol                     | 151.01                                          | 27.73    | 15.22    | 26.00    | 60.84    | 26.21    | 26.99    | 134.86   | 24.43     | 60.14     | 51.03     | 56.97     | 97.01    | 32.44    | 43.41    | 244.13   | 136.34   |
| P45          | 29.78                       | L-Aspartic acid                | 11968.22                                        | 20104.03 | 16043.77 | 12478.89 | 18409.32 | 20146.47 | 18597.29 | 22059.37 | 1389.51   | 2286.80   | 472.69    | 944.59    | 744.36   | 45.72    | 6.75     | 1623.02  | 126.09   |
| P46          | 29.88                       | L-5-Oxoproline                 | 16305.61                                        | 19368.22 | 15389.81 | 9584.53  | 19017.66 | 18122.82 | 16605.36 | 19517.20 | 1.77      | 1.94      | 2.14      | 1.51      | 1.83     | 5744.69  | 7243.63  | 10035.62 | 2874.21  |

| Compound No. | Retention<br>time (min) | Compound name                                        | Concentration of identified metabolites (mg/kg) |          |          |          |          |          |          |          |          |          |          |          |          |          |          |          |          |
|--------------|-------------------------|------------------------------------------------------|-------------------------------------------------|----------|----------|----------|----------|----------|----------|----------|----------|----------|----------|----------|----------|----------|----------|----------|----------|
|              |                         |                                                      | WCF                                             | CCF      | LCF0     | LCF1     | LCF2     | LCF3     | LCF4     | LFB      | LOS1     | LOS2     | LOS3     | LOS4     | LOS5     | TxLU     | TxLI     | TxPU     | TxPI     |
| P47          | 29.99                   | 4-Aminobutanoic acid                                 | 5785.50                                         | 1416.50  | 1830.01  | 2129.51  | 4167.39  | 1403.13  | 1493.44  | 787.30   | 41851.10 | 40032.56 | 41598.44 | 42607.26 | 42055.97 | 80.82    | 103.13   | 1190.29  | 1599.43  |
| P48          | 30.39                   | DL-Phenylalanine                                     | 281.38                                          | 340.01   | 242.86   | 265.89   | 446.98   | 470.38   | 411.77   | 937.44   | 47.90    | 28.76    | 33.35    | 402.95   | 69.09    | 60.75    | 38.91    | 303.97   | 297.56   |
| P49          | 30.66                   | Cysteine                                             | 131.37                                          | 177.32   | 123.03   | 72.67    | 212.39   | 183.05   | 182.47   | 126.45   | 0.47     | 0.77     | 1.28     | 0.96     | 2.14     | 849.21   | 861.10   | 941.99   | 562.50   |
| P50          | 30.91                   | 2,3,4-Trihydroxy-butanoic acid                       | 671.50                                          | 163.44   | 128.99   | 98.20    | 179.70   | 159.08   | 128.88   | 419.70   | 956.48   | 950.29   | 1061.77  | 978.13   | 884.56   | 140.32   | 134.18   | 346.59   | 216.98   |
| P51          | 31.07                   | 2-Hydroxyglutaric acid                               | 406.75                                          | 80.32    | 15.60    | 12.10    | 16.26    | 13.19    | 12.09    | 17.66    | 1.39     | 3.74     | 4.15     | 9.04     | 4.70     | 1383.53  | 1583.40  | 6019.29  | 3653.59  |
| P52          | 31.57                   | L-Asparagine                                         | 242.43                                          | 625.91   | 451.65   | 315.14   | 899.51   | 912.14   | 921.28   | 1818.95  | 0.64     | 0.76     | 0.98     | 0.69     | 0.54     | 130.06   | 165.34   | 149.36   | 74.43    |
| P53          | 31.77                   | Pipecolic acid                                       | 1553.82                                         | 3004.02  | 80.23    | 1132.03  | 2107.97  | 143.26   | 153.46   | 243.89   | 8.28     | 2.23     | 2.11     | 3.33     | 0.73     | 57.06    | 77.59    | 520.36   | 232.86   |
| P54          | 32.03                   | L-Ornithine                                          | 516.89                                          | 1797.56  | 1698.17  | 730.58   | 1892.34  | 1953.81  | 1865.38  | 45.26    | 0.05     | 0.15     | 0.12     | 0.12     | 0.00     | 493.23   | 334.97   | 1392.58  | 723.82   |
| P55          | 32.15                   | L-Glutamic acid                                      | 28857.78                                        | 35500.53 | 27846.04 | 23064.23 | 32456.34 | 35041.60 | 27845.51 | 34562.72 | 1.32     | 6.78     | 1.33     | 0.85     | 1.15     | 5316.13  | 5620.55  | 10949.31 | 7911.16  |
| P56          | 32.38                   | L-Phenylalanine                                      | 9839.63                                         | 13737.99 | 11155.84 | 9338.63  | 13968.49 | 14297.18 | 14247.12 | 10611.38 | 31.43    | 35.45    | 38.21    | 39.91    | 34.97    | 5663.68  | 4511.82  | 14136.48 | 13608.45 |
| P57          | 33.16                   | 3,4,5-Trihydroxy-pentanoic acid                      | 2.34                                            | 5.48     | 4.14     | 3.80     | 4.57     | 5.97     | 3.35     | 314.61   | 0.37     | 0.33     | 3.51     | 0.28     | 0.67     | 2.25     | 2.61     | 19.20    | 12.80    |
| P58          | 33.41                   | Asparagine                                           | 2334.36                                         | 5575.97  | 4583.94  | 2799.16  | 5828.03  | 6408.06  | 6124.30  | 2778.28  | 0.93     | 0.31     | 0.51     | 0.64     | 0.56     | 2690.96  | 4221.59  | 2001.40  | 1330.91  |
| P59          | 33.76                   | 2,3,4,5-Tetrahydroxy-pentanal O-ethyl-oxime          | 15.96                                           | 30.10    | 32.25    | 21.01    | 34.73    | 29.31    | 18.03    | 56.63    | 100.75   | 4.45     | 45.75    | 75.48    | 101.22   | 177.58   | 121.10   | 81.36    | 36.91    |
| P60          | 34.34                   | 2-Aminoadipic acid                                   | 289.22                                          | 704.83   | 763.34   | 297.50   | 687.63   | 760.86   | 784.22   | 1155.59  | 0.13     | 0.21     | 0.64     | 0.08     | 0.57     | 14.54    | 23.51    | 1478.57  | 256.39   |
| P61          | 34.73                   | Xylitol                                              | 10712.16                                        | 20867.99 | 16126.88 | 12776.73 | 18268.51 | 19984.38 | 20284.90 | 18442.97 | 7598.60  | 8539.28  | 8390.36  | 8705.52  | 8197.56  | 12505.46 | 12885.73 | 13072.37 | 11587.16 |
| P62          | 34.91                   | Putrescine                                           | 12195.05                                        | 12273.86 | 1655.00  | 3024.44  | 10909.86 | 12603.41 | 15668.91 | 14691.14 | 8606.56  | 9194.46  | 10586.34 | 12166.86 | 7372.32  | 2583.04  | 1052.56  | 6223.38  | 14049.22 |
| P63          | 35.01                   | Aconitic acid                                        | 25.46                                           | 20.64    | 22.26    | 22.07    | 24.69    | 30.76    | 42.58    | 32.19    | 1.84     | 0.57     | 5.09     | 0.84     | 0.17     | 3.28     | 4.16     | 2.99     | 2.30     |
| P64          | 35.18                   | DL-Ornithine                                         | 2098.24                                         | 3335.98  | 1339.20  | 1038.40  | 2990.24  | 3202.08  | 3451.15  | 1320.83  | 0.44     | 0.42     | 0.78     | 0.44     | 0.22     | 94.71    | 43.61    | 1790.31  | 723.30   |
| P65          | 35.61                   | Phosphoric acid mono-(2,3-dihydroxy-propyl)<br>ester | 294.36                                          | 279.96   | 491.86   | 274.70   | 435.14   | 514.09   | 410.76   | 2305.28  | 2063.41  | 219.39   | 659.19   | 285.15   | 328.76   | 4810.68  | 5094.94  | 2279.57  | 1575.77  |
| P66          | 35.73                   | L-Glutamine                                          | 5631.40                                         | 16321.25 | 16371.82 | 11986.29 | 18541.64 | 20294.21 | 20344.21 | 8071.05  | 0.34     | 1.07     | 0.39     | 0.19     | 0.20     | 3792.40  | 6215.85  | 5291.47  | 3045.89  |
| P67          | 35.95                   | Terephthalic acid                                    | 502.71                                          | 574.63   | 537.89   | 582.45   | 587.20   | 622.71   | 880.55   | 640.07   | 622.66   | 147.23   | 218.73   | 79.81    | 80.11    | 544.01   | 772.35   | 452.35   | 444.12   |
| P68          | 35.98                   | 3,4,5,6-Tetrahydroxy-2-oxo-hexanoic acid             | 204.72                                          | 351.86   | 249.04   | 219.49   | 379.05   | 405.78   | 666.64   | 866.99   | 9727.10  | 2840.68  | 4668.45  | 4138.34  | 4855.12  | 48.83    | 87.90    | 236.99   | 137.55   |
| P69          | 36.01                   | Phosphorylethanolamine                               | 102.37                                          | 1634.70  | 2931.86  | 1605.33  | 139.91   | 182.59   | 133.94   | 12485.88 | 7.49     | 1.29     | 4.48     | 7.15     | 2.51     | 9874.80  | 12767.53 | 11303.51 | 4286.24  |

| Compound No. | Retention<br>time (min) | Compound name       | Concentration of identified metabolites (mg/kg) |          |          |          |          |          |          |          |           |           |           |           |           |          |          |          |          |
|--------------|-------------------------|---------------------|-------------------------------------------------|----------|----------|----------|----------|----------|----------|----------|-----------|-----------|-----------|-----------|-----------|----------|----------|----------|----------|
|              |                         |                     | WCF                                             | CCF      | LCF0     | LCF1     | LCF2     | LCF3     | LCF4     | LFB      | LOS1      | LOS2      | LOS3      | LOS4      | LOS5      | TxLU     | TxLI     | TxPU     | TxPI     |
| P70          | 36.38                   | 9H-Purin-6-ol       | 114.96                                          | 4.31     | 6.56     | 1.67     | 7.28     | 9.25     | 5.22     | 2.09     | 0.34      | 0.32      | 0.30      | 0.32      | 0.43      | 279.63   | 195.16   | 2820.50  | 2102.10  |
| P71          | 36.83                   | Citric acid         | 21190.31                                        | 20924.73 | 17769.12 | 15133.83 | 20511.18 | 20386.00 | 18245.51 | 24732.85 | 1.78      | 0.97      | 0.78      | 1.88      | 0.82      | 0.38     | 0.22     | 0.46     | 0.26     |
| P72          | 36.98                   | Myristic acid       | 42.13                                           | 46.50    | 35.59    | 43.93    | 56.65    | 25.57    | 43.87    | 15.16    | 52.40     | 39.91     | 46.67     | 40.67     | 42.91     | 138.78   | 164.38   | 295.92   | 670.27   |
| P73          | 37.02                   | Cadaverine          | 2445.17                                         | 2824.17  | 2283.95  | 1334.26  | 3592.68  | 3839.01  | 3465.31  | 1530.48  | 7.22      | 16.63     | 6.71      | 8.06      | 25.76     | 1362.94  | 1386.34  | 4282.13  | 10462.92 |
| P74          | 38.02                   | DL-tyrosine         | 355.41                                          | 454.28   | 375.70   | 183.77   | 613.74   | 560.94   | 475.43   | 1094.02  | 1.27      | 6.99      | 1.93      | 1.40      | 4.72      | 959.28   | 795.78   | 5123.78  | 3433.78  |
| P75          | 38.08                   | D-Fructose          | 1723.37                                         | 266.35   | 85.97    | 54.33    | 127.70   | 76.75    | 126.54   | 89.27    | 45026.35  | 53471.19  | 47418.77  | 44990.92  | 41529.82  | 50.51    | 444.16   | 281.06   | 135.10   |
| P76          | 38.67                   | d-Glucose           | 1390.82                                         | 832.82   | 322.79   | 284.83   | 14702.66 | 391.92   | 454.86   | 369.70   | 120541.80 | 133368.73 | 129054.90 | 131409.37 | 128657.98 | 7715.15  | 8829.20  | 739.80   | 23487.71 |
| P77          | 38.47                   | Galactopyranose     | 229.96                                          | 103.24   | 140.54   | 83.75    | 293.78   | 386.22   | 405.00   | 247.41   | 1153.49   | 1386.45   | 1254.54   | 1187.91   | 1098.38   | 640.18   | 924.12   | 7195.75  | 6555.78  |
| P78          | 38.67                   | D-Allose            | 19720.57                                        | 19175.25 | 24047.46 | 26641.55 | 17420.42 | 27377.77 | 29133.90 | 22416.94 | 36535.32  | 80168.87  | 74939.69  | 73045.63  | 64340.92  | 30980.40 | 46521.74 | 41275.54 | 39919.92 |
| P79          | 38.82                   | L-Lysine            | 10029.60                                        | 10250.61 | 8501.14  | 6183.49  | 10254.60 | 11888.73 | 10124.79 | 1056.66  | 0.43      | 0.96      | 0.39      | 0.91      | 1.25      | 6669.24  | 7739.61  | 12834.86 | 9868.40  |
| P80          | 38.87                   | L-Histidine         | 4348.25                                         | 5162.31  | 2939.64  | 1393.82  | 4970.13  | 6146.82  | 4784.36  | 482.24   | 0.33      | 0.16      | 0.26      | 0.10      | 0.12      | 12161.89 | 12944.06 | 5995.92  | 3642.69  |
| P81          | 39.17                   | L-Tyrosine          | 7966.71                                         | 8067.29  | 5219.77  | 20836.79 | 7820.11  | 8505.39  | 8371.09  | 8577.95  | 26.61     | 59.09     | 60.80     | 85.90     | 97.05     | 12831.33 | 12280.36 | 13581.85 | 16467.25 |
| P82          | 40.15                   | Glucopyranose       | 103.63                                          | 270.28   | 192.47   | 28.26    | 428.45   | 452.90   | 334.43   | 356.48   | 12836.21  | 12986.77  | 13471.13  | 9091.49   | 11773.55  | 1385.67  | 874.13   | 11013.70 | 10885.12 |
| P83          | 40.56                   | 9-Hexadecenoic acid | 194.42                                          | 140.42   | 59.97    | 109.55   | 173.66   | 85.30    | 51.90    | 32.39    | 2.87      | 7.09      | 9.27      | 15.48     | 6.82      | 189.51   | 203.81   | 484.70   | 913.89   |
| P84          | 40.78                   | D-Gluconic acid     | 746.91                                          | 150.25   | 30.37    | 21.51    | 63.65    | 36.09    | 51.07    | 295.11   | 718.52    | 146.97    | 225.23    | 68.43     | 90.79     | 13.11    | 24.90    | 423.84   | 155.87   |
| P85          | 41.23                   | Palmitic Acid       | 291.93                                          | 149.40   | 218.87   | 92.45    | 171.47   | 180.11   | 147.61   | 686.54   | 126.65    | 202.30    | 241.95    | 246.24    | 149.58    | 27.32    | 312.92   | 12.10    | 31.30    |
| P86          | 40.93                   | Scyllo-Inositol     | 13311.44                                        | 9891.43  | 7834.41  | 12556.99 | 14316.67 | 3734.76  | 4281.54  | 2657.99  | 644.13    | 416.68    | 640.23    | 411.60    | 354.01    | 12213.29 | 13576.19 | 19338.88 | 28627.49 |
| P87          | 42.00                   | Ferulic acid        | 2.22                                            | 4.65     | 20.74    | 5.06     | 5.11     | 7.34     | 4.20     | 0.86     | 0.15      | 0.22      | 0.13      | 0.12      | 0.16      | 24.88    | 47.03    | 44.04    | 36.79    |
| P88          | 42.35                   | Lanthionine         | 99.57                                           | 248.40   | 185.73   | 41.05    | 143.93   | 261.14   | 214.40   | 115.53   | 2.77      | 3.14      | 7.31      | 7.01      | 7.71      | 2895.63  | 3204.97  | 8211.66  | 8360.68  |
| P89          | 42.43                   | Myo-Inositol        | 2124.50                                         | 398.19   | 170.97   | 116.00   | 253.71   | 226.77   | 248.60   | 2774.01  | 34651.13  | 34944.30  | 34210.67  | 37001.41  | 38050.68  | 503.56   | 571.80   | 3559.01  | 2612.09  |
| P90          | 44.05                   | Linoleic acid       | 4855.54                                         | 2054.74  | 920.87   | 1191.56  | 2088.68  | 1460.48  | 975.29   | 789.20   | 43.16     | 7.08      | 15.01     | 30.54     | 23.04     | 1373.38  | 1703.47  | 5809.00  | 6684.59  |
| P91          | 44.06                   | Kynurenine          | 0.54                                            | 0.34     | 0.16     | 0.09     | 0.62     | 0.21     | 0.69     | 0.28     | 1.25      | 1.33      | 0.67      | 1.07      | 1.13      | 0.14     | 0.15     | 1358.64  | 610.28   |
| P92          | 44.15                   | Oleic acid          | 9270.78                                         | 7171.84  | 4950.50  | 5475.21  | 6998.13  | 4977.68  | 4706.69  | 98.53    | 1.52      | 8.68      | 17.23     | 18.19     | 1.36      | 6892.74  | 8622.29  | 19360.47 | 27063.37 |
| P93          | 44.37                   | Cystathionine       | 187.77                                          | 385.54   | 234.83   | 104.44   | 228.85   | 414.51   | 356.29   | 131.81   | 0.28      | 0.28      | 0.21      | 0.35      | 0.27      | 6.16     | 15.67    | 198.92   | 208.97   |

| Compound No. | Retention<br>time (min) | Compound name | Concentration of identified metabolites (mg/kg) |          |          |          |          |          |          |          |          |           |           |           |           |          |          |         |          |
|--------------|-------------------------|---------------|-------------------------------------------------|----------|----------|----------|----------|----------|----------|----------|----------|-----------|-----------|-----------|-----------|----------|----------|---------|----------|
|              |                         |               | WCF                                             | CCF      | LCF0     | LCF1     | LCF2     | LCF3     | LCF4     | LFB      | LOS1     | LOS2      | LOS3      | LOS4      | LOS5      | TxLU     | TxLI     | TxPU    | TxPI     |
| P94          | 44.53                   | Stearic acid  | 1101.53                                         | 520.76   | 400.76   | 403.16   | 597.28   | 287.31   | 2383.00  | 380.49   | 58.26    | 52.29     | 64.27     | 50.32     | 42.51     | 1035.17  | 1107.71  | 2333.56 | 2765.54  |
| P95          | 44.59                   | L-Tryptophan  | 1179.09                                         | 874.31   | 1129.81  | 576.92   | 780.39   | 925.50   | 932.29   | 798.81   | 0.82     | 0.51      | 0.13      | 0.21      | 0.41      | 4051.28  | 1079.99  | 9889.36 | 11973.24 |
| P96          | 44.87                   | D-Glucitol    | 1042.83                                         | 343.65   | 180.28   | 160.20   | 439.05   | 300.01   | 256.53   | 457.92   | 3.52     | 4.36      | 2.57      | 1.31      | 3.72      | 0.88     | 14.78    | 1.45    | 1.44     |
| P97          | 51.72                   | Adenosine     | 1523.79                                         | 407.61   | 72.90    | 39.67    | 141.56   | 70.67    | 51.01    | 137.81   | 11659.50 | 12798.46  | 11581.88  | 11586.94  | 10373.55  | 87.71    | 99.75    | 35.24   | 73.53    |
| P98          | 52.36                   | Sucrose       | 71441.04                                        | 59447.05 | 18659.10 | 31148.67 | 50631.48 | 52056.58 | 50751.48 | 70687.33 | 29610.89 | 231855.81 | 198712.56 | 247340.01 | 209603.44 | 54021.23 | 52875.95 | 8817.60 | 8846.48  |

**Table S4.** Top ten compounds in concentrations from different products.

| Sample | 1        |           | 2        |           | 3        |           | 4        |          | 5        |          | 6        |          | 7        |          | 8        |          | 9        |          | 10       |          |
|--------|----------|-----------|----------|-----------|----------|-----------|----------|----------|----------|----------|----------|----------|----------|----------|----------|----------|----------|----------|----------|----------|
|        | Compound | Content   | Compound | Content   | Compound | Content   | Compound | Content  | Compound | Content  | Compound | Content  | Compound | Content  | Compound | Content  | Compound | Content  | Compound | Content  |
|        | No.      | (mg/kg)   | No.      | (mg/kg)   | No.      | (mg/kg)   | No.      | (mg/kg)  | No.      | (mg/kg)  | No.      | (mg/kg)  | No.      | (mg/kg)  | No.      | (mg/kg)  | No.      | (mg/kg)  | No.      | (mg/kg)  |
| WCF    | P98      | 71441.04  | P55      | 28857.78  | P71      | 21190.31  | P78      | 19720.57 | P46      | 16305.61 | P86      | 13311.44 | P62      | 12195.05 | P45      | 11968.22 | P27      | 11092.81 | P61      | 10712.16 |
| CCF    | P98      | 59447.05  | P55      | 35500.53  | P71      | 20924.73  | P61      | 20867.99 | P45      | 20104.03 | P46      | 19368.22 | P78      | 19175.25 | P66      | 16321.25 | P25      | 14613.05 | P56      | 13737.99 |
| LCF0   | P55      | 27846.04  | P78      | 24047.46  | P98      | 18659.10  | P71      | 17769.12 | P66      | 16371.82 | P61      | 16126.88 | P45      | 16043.77 | P46      | 15389.81 | P23      | 14957.70 | P15      | 11396.86 |
| LCF1   | P98      | 31148.67  | P78      | 26641.55  | P55      | 23064.23  | P81      | 20836.79 | P71      | 15133.83 | P23      | 12834.32 | P61      | 12776.73 | P86      | 12556.99 | P45      | 12478.89 | P66      | 11986.29 |
| LCF2   | P98      | 50631.48  | P55      | 32456.34  | P71      | 20511.18  | P46      | 19017.66 | P66      | 18541.64 | P45      | 18409.32 | P61      | 18268.51 | P78      | 17420.42 | P76      | 14702.66 | P86      | 14316.67 |
| LCF3   | P98      | 52056.58  | P55      | 35041.60  | P78      | 27377.77  | P71      | 20386.00 | P66      | 20294.21 | P45      | 20146.47 | P61      | 19984.38 | P46      | 18122.82 | P56      | 14297.18 | P15      | 12955.70 |
| LCF4   | P98      | 50751.48  | P78      | 29133.90  | P55      | 27845.51  | P66      | 20344.21 | P61      | 20284.90 | P45      | 18597.29 | P71      | 18245.51 | P46      | 16605.36 | P62      | 15668.91 | P56      | 14247.12 |
| LFB    | P98      | 70687.33  | P55      | 34562.72  | P71      | 24732.85  | P78      | 22416.94 | P45      | 22059.37 | P46      | 19517.20 | P61      | 18442.97 | P62      | 14691.14 | P23      | 14237.23 | P69      | 12485.88 |
| LOS1   | P38      | 143003.83 | P76      | 120541.80 | P24      | 62239.54  | P75      | 45026.35 | P47      | 41851.10 | P78      | 36535.32 | P89      | 34651.13 | P43      | 30824.21 | P98      | 29610.89 | P32      | 13798.90 |
| LOS2   | P98      | 231855.81 | P38      | 204567.98 | P76      | 133368.73 | P78      | 80168.87 | P24      | 66830.66 | P75      | 53471.19 | P47      | 40032.56 | P89      | 34944.30 | P43      | 30833.39 | P32      | 14488.33 |
| LOS3   | P98      | 198712.56 | P76      | 129054.90 | P38      | 108996.13 | P78      | 74939.69 | P24      | 67186.83 | P75      | 47418.77 | P47      | 41598.44 | P89      | 34210.67 | P43      | 31150.41 | P14      | 21889.46 |
| LOS4   | P98      | 247340.01 | P38      | 177710.15 | P76      | 131409.37 | P78      | 73045.63 | P24      | 61732.64 | P75      | 44990.92 | P47      | 42607.26 | P89      | 37001.41 | P43      | 31157.06 | P62      | 12166.86 |
| LOS5   | P98      | 209603.44 | P76      | 128657.98 | P78      | 64340.92  | P24      | 62623.95 | P47      | 42055.97 | P75      | 41529.82 | P14      | 38851.59 | P89      | 38050.68 | P43      | 31692.57 | P82      | 11773.55 |
| TxLU   | P98      | 54021.23  | P78      | 30980.40  | P27      | 14297.52  | P81      | 12831.33 | P61      | 12505.46 | P86      | 12213.29 | P80      | 12161.89 | P34      | 10826.84 | P26      | 10316.26 | P69      | 9874.80  |
| TxLI   | P98      | 52875.95  | P78      | 46521.74  | P27      | 15522.63  | P86      | 13576.19 | P80      | 12944.06 | P61      | 12885.73 | P69      | 12767.53 | P38      | 12693.48 | P81      | 12280.36 | P34      | 11731.32 |
| TxPU   | P78      | 41275.54  | P92      | 19360.47  | P86      | 19338.88  | P27      | 14790.47 | P56      | 14136.48 | P81      | 13581.85 | P25      | 13157.66 | P61      | 13072.37 | P33      | 12876.62 | P79      | 12834.86 |
| TxPI   | P78      | 39919.92  | P86      | 28627.49  | P92      | 27063.37  | P76      | 23487.71 | P27      | 18679.14 | P81      | 16467.25 | P25      | 15314.62 | P23      | 14932.24 | P62      | 14049.22 | P26      | 13696.77 |

**Table S5.** Results of Significance Analysis of Metabolomics (SAM).

| Metabolite             | d.value | stdev    | rawp     | q.value  |
|------------------------|---------|----------|----------|----------|
| Citric acid            | 38.866  | 0.016437 | 0        | 0        |
| L-Glutamine            | 30.606  | 0.051326 | 0        | 0        |
| L-Histidine            | 28.556  | 0.10068  | 0        | 0        |
| L-Glutamic acid        | 26.218  | 0.042574 | 0        | 0        |
| L-Lysine               | 24.693  | 0.078012 | 0        | 0        |
| L-5-Oxoproline         | 23.377  | 0.017388 | 0        | 0        |
| Asparagine             | 22.788  | 0.034207 | 0        | 0        |
| L-Ornithine            | 22.248  | 0.24214  | 0        | 0        |
| L-Tryptophan           | 20.787  | 0.08216  | 0        | 0        |
| DL-Ornithine           | 17.31   | 0.15427  | 0        | 0        |
| DL-Serine              | 15.18   | 0.034172 | 0        | 0        |
| 2-Aminoadipic acid     | 13.695  | 0.25498  | 0        | 0        |
| L-Asparagine           | 12.109  | 0.048584 | 0        | 0        |
| Oleic acid             | 11.648  | 0.31021  | 0        | 0        |
| Cystathionine          | 10.798  | 0.15555  | 0        | 0        |
| Cysteine               | 9.8191  | 0.030501 | 0        | 0        |
| L-Phenylalanine        | 9.7942  | 0.017557 | 0        | 0        |
| Phosphorylethanolamine | 9.6259  | 0.34371  | 0        | 0        |
| DL-tyrosine            | 9.4954  | 0.090277 | 0        | 0        |
| 9H-Purin-6-ol          | 9.48    | 0.23463  | 0        | 0        |
| D-Fructose             | 8.735   | 0.15007  | 0        | 0        |
| 3-Amino-2-piperidone   | 8.697   | 0.24668  | 0        | 0        |
| Lanthionine            | 8.6905  | 0.062647 | 0        | 0        |
| Cadaverine             | 8.6409  | 0.072732 | 0        | 0        |
| D-Glucitol             | 7.9029  | 0.11047  | 0        | 0        |
| L-Tyrosine             | 7.8836  | 0.028593 | 0        | 0        |
| L-Methionine           | 7.6682  | 0.31912  | 0        | 0        |
| 2-Hydroxyglutaric acid | 7.2319  | 0.19349  | 0        | 0        |
| L-Serine               | 6.6673  | 0.019619 | 0        | 0        |
| Pipecolic acid         | 6.2123  | 0.27263  | 0        | 0        |
| Linoleic acid          | 6.0012  | 0.086702 | 0.000102 | 4.33E-05 |
| L-Threonine            | 5.9667  | 0.20214  | 0.000102 | 4.33E-05 |
| Adenosine              | 5.958   | 0.14836  | 0.000102 | 4.33E-05 |
| d-Glucose              | 5.7383  | 0.2496   | 0.000306 | 0.000116 |
| Ferulic acid           | 5.6921  | 0.085019 | 0.000306 | 0.000116 |
| L-Aspartic acid        | 5.5494  | 0.23511  | 0.000306 | 0.000116 |
| b-Alanine              | 5.5343  | 0.33275  | 0.000306 | 0.000116 |
| Aminomalonic acid      | 5.4269  | 0.083905 | 0.000408 | 0.00015  |
| Myo-Inositol           | 4.7294  | 0.17018  | 0.001122 | 0.000403 |

**Table S6.** Predictions of pathways involving featured metabolites from Figure 4C.

| Pathway Name                                | Match Status | p         | -log(p) | Holm p  | FDR     | Impact  | Details |
|---------------------------------------------|--------------|-----------|---------|---------|---------|---------|---------|
| Alanine, aspartate and glutamate metabolism | 3/23         | 0.0049299 | 2.3072  | 0.39932 | 0.21126 | 0.42906 | KEGG    |
| Glyoxylate and dicarboxylate metabolism     | 3/24         | 0.0055783 | 2.2535  | 0.44627 | 0.21126 | 0.0875  | KEGG    |
| Galactose metabolism                        | 3/27         | 0.0078243 | 2.1066  | 0.61812 | 0.21126 | 0.0     | KEGG    |
| Arginine biosynthesis                       | 2/12         | 0.014443  | 1.8404  | 1.0     | 0.29246 | 0.05714 | KEGG    |
| beta-Alanine metabolism                     | 2/14         | 0.019542  | 1.709   | 1.0     | 0.31658 | 0.277   | KEGG    |
| Aminoacyl-tRNA biosynthesis                 | 3/48         | 0.037536  | 1.4255  | 1.0     | 0.44627 | 0.0     | KEGG    |
| Citrate cycle (TCA cycle)                   | 2/20         | 0.038567  | 1.4138  | 1.0     | 0.44627 | 0.14041 | KEGG    |
| Glutathione metabolism                      | 2/26         | 0.062368  | 1.205   | 1.0     | 0.62788 | 0.04167 | KEGG    |
| Nitrogen metabolism                         | 1/5          | 0.077516  | 1.1106  | 1.0     | 0.62788 | 0.0     | KEGG    |
| D-Glutamine and D-glutamate metabolism      | 1/5          | 0.077516  | 1.1106  | 1.0     | 0.62788 | 1.0     | KEGG    |
| Glycerolipid metabolism                     | 1/13         | 0.18989   | 0.7215  | 1.0     | 1.0     | 0.1875  | KEGG    |
| Butanoate metabolism                        | 1/14         | 0.20299   | 0.69252 | 1.0     | 1.0     | 0.0     | KEGG    |
| Fructose and mannose metabolism             | 1/16         | 0.2286    | 0.64092 | 1.0     | 1.0     | 0.0459  | KEGG    |
| Pantothenate and CoA biosynthesis           | 1/18         | 0.25344   | 0.59613 | 1.0     | 1.0     | 0.0     | KEGG    |
| Propanoate metabolism                       | 1/21         | 0.28928   | 0.53868 | 1.0     | 1.0     | 0.0     | KEGG    |
| Pyruvate metabolism                         | 1/22         | 0.30087   | 0.52162 | 1.0     | 1.0     | 0.0     | KEGG    |

---

| Pathway Name                         | Match Status | p       | -log(p) | Holm p | FDR | Impact  | Details |
|--------------------------------------|--------------|---------|---------|--------|-----|---------|---------|
| Porphyrin and chlorophyll metabolism | 1/24         | 0.32351 | 0.49012 | 1.0    | 1.0 | 0.0     | KEGG    |
| Arginine and proline metabolism      | 1/31         | 0.39742 | 0.40075 | 1.0    | 1.0 | 0.11228 | KEGG    |
| Pyrimidine metabolism                | 1/40         | 0.48132 | 0.31757 | 1.0    | 1.0 | 0.0     | KEGG    |
| Fatty acid biosynthesis              | 1/43         | 0.50675 | 0.29521 | 1.0    | 1.0 | 0.0     | KEGG    |
